# Supplementary material
Source: PubMed Central journal article supplement (PMC2753215)
Supplement: NIHMS49310-supplement-Supplement.pdf [file NIHMS49310-supplement-Supplement.pdf]

Supplemental Figure 1

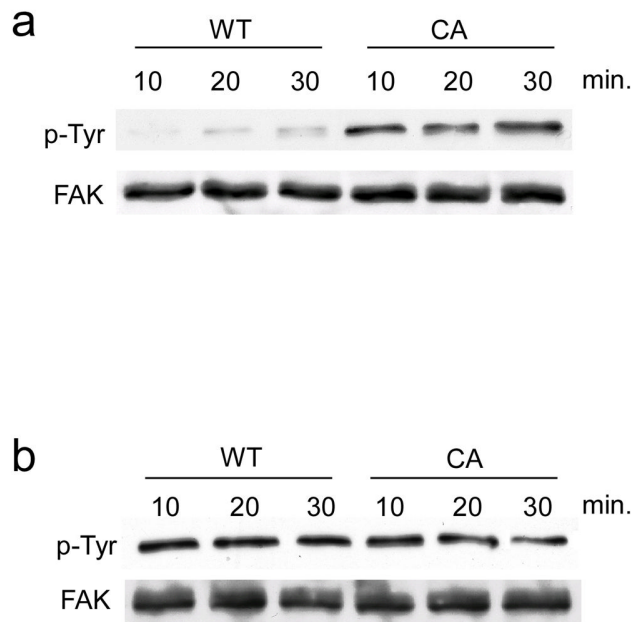

Legend: C4-2 cells expressing constitutively active  $\alpha\beta 3$  (CA, D723R) readily bind ligand and signal without the need for stimulation (inside-out signaling). C4-2 cells re-expressing  $\beta 3$  WT or CA were plated in Vn coated dishes (a) or pretreated with VEGF (10ng/mL) followed by plating in Vn coated dishes (b). Cell lysates from select time points were separated by SDS-PAGE, transferred to nitrocellulose and analyzed by immunoblotting with anti-phospho FAK Y379 (Chemicon) and FAK antibodies (Cell Signaling Technology). a) C4-2 CA  $\alpha\beta 3$  cells bind Vn and signal through  $\alpha\beta 3$  resulting in FAK Y379 phosphorylation at high levels as early as 10 minutes. C4-2  $\alpha\beta 3$  WT cells required at least 20 minutes for minimal FAK Y379 phosphorylation. b) Incubation of  $\alpha\beta 3$  WT cells with VEGF prior to plating on Vn provides  $\alpha\beta 3$  WT cells with an activating stimulus that promotes rapid signal internalization following ligand binding. FAK Y397 phosphorylation is similar for both C4-2 cell lines at all time points tested.

**Supplemental Table 1. Analysis of C4-2 expression of integrin  $\alpha$ v $\beta$ 3 expression and state of activation**

|                  | $\beta$ 3 (-) | $\beta$ 3 WT | $\beta$ 3 D723R | $\beta$ 3 S752P |
|------------------|---------------|--------------|-----------------|-----------------|
| MFI              | 75.1          | 323.95       | 314.56          | 301.99          |
| Activation Index | 1.0           | 2.9          | 10.2            | n.d.            |

NOTE: Expression levels of  $\alpha$ v $\beta$ 3 following retroviral infection for  $\beta$ 3 expression was determined by FACS analysis (FACSCalibur/CellQuest software package; Becton Dickinson, San Jose, CA). Cells were incubated with mouse monoclonal anti-  $\alpha$ v $\beta$ 3 (LM609; Chemicon, Temecula, CA) or with control mouse IgG (Invitrogen, Carlsbad, CA) for 1h at 25°C. Cells were washed 2x in PBS then incubated with Alexa-Fluor 488 conjugated anti-mouse IgG (Invitrogen) and subjected to FACS analysis. The functional activity of the  $\beta$ 3 integrin was assessed on the basis of fibrinogen binding by suspending cells in RPMI with 0.2% BSA, followed by treatment with or without cRGDfv (50 $\mu$ M) and Fluorescein isothiocyanate (FITC)-labeled fibrinogen at a final concentration of 1 $\mu$ M for 30 min. Cells were washed and the numbers of FITC-Fibrinogen bound cells were determined by FACS analysis. The percentages of activation index of cell types were calculated as follows:

$$\% \text{ Activation Index} = \frac{\text{MFI(FITC-Fgn)} - \text{MFI(FITC-Fgn + cRGDfv)}}{\text{MFI of } \beta 3 \text{ Expression}} \times 100$$

Resulting values were normalized to the activation index of C4-2  $\beta$ 3(-) cells, which were assigned a value of 1.

Supplemental Table 2. Adhesion and migration of C4-2 cells to bone matrix proteins and extract

| Parameter                                         |                        | C4-2 cell line     |                   |                   |                         |
|---------------------------------------------------|------------------------|--------------------|-------------------|-------------------|-------------------------|
|                                                   |                        | $\alpha\beta3$ (-) | $\alpha\beta3$ WT | $\alpha\beta3$ CA | $\alpha\beta3$ inactive |
| Adhesion to Vn<br>(cells x1000)                   | no $Mn^{2+}$           | 6 ± 1              | 7 ± 1             | 14 ± 1            | 4 ± 1                   |
|                                                   | $Mn^{2+}$              | 5 ± 2              | 14 ± 1            | 14 ± 1            | 5 ± 1                   |
| Migration to Vn<br>(cells per field)              | Alone                  | 28 ± 3             | 124 ± 4           | 179 ± 7           | 64 ± 5                  |
|                                                   | + anti- $\alpha\beta3$ | 24 ± 3             | 40 ± 5            | 33 ± 3            | 32 ± 2                  |
| Migration to BSP<br>(cells per field)             | no $Mn^{2+}$           | 2 ± 1              | 22 ± 4            | 73 ± 6            | 4 ± 1                   |
|                                                   | $Mn^{2+}$              | 2 ± 1              | 46 ± 3            | 100 ± 9           | 8 ± 2                   |
| Migration to SPARC<br>(cells per field)           | alone                  | 3 ± 1              | 33 ± 3            | 50 ± 3            | 17 ± 3                  |
|                                                   | + anti- $\alpha\beta3$ | 1 ± 0              | 15 ± 3            | 11 ± 1            | 14 ± 2                  |
| % Adhesion to<br>Bone Extract                     | no $Mn^{2+}$           | 5 ± 1              | 6 ± 2             | 20 ± 3            | 4 ± 1                   |
|                                                   | $Mn^{2+}$              | 8 ± 1              | 19 ± 0            | 27 ± 3            | 6 ± 1                   |
| Migration to Bone<br>Extract<br>(cells per field) |                        | 15 ± 1             | 38 ± 2            | 64 ± 3            | 21 ± 2                  |

Adhesion and migration experiments were performed in triplicate (anti- $\alpha\beta3$ = 20ug/ml;  $Mn^{2+}$ =1mM; Vn, BSP, SPARC and bone extracts were a 10ug/ml). Cell counts were determined by counting the number of adherent or migrated cells from 10 fields of each experiment.  $\beta3$  (-) cells lack  $\alpha\beta3$  heterodimer expression;  $\beta3$  WT cells express resting, yet activatable  $\alpha\beta3$ ;  $\beta3$  CA cells express constitutively active  $\alpha\beta3$ ;  $\beta3$  inactive cells express resting, non-activatable  $\alpha\beta3$ .
